# Supplementary material for: Comprehensive native glycan profiling with isomer separation and quantitation for the discovery of cancer biomarkers
Source: Royal Society of Chemistry journal article supplement (doi:10.1039/c1an15093f), 2011-01-01
Supplement: c1an15093f.pdf [file c1an15093f.pdf]

**Supplemental Table 1:** Complex/hybrid and high-mannose type N-glycan isomers which showed statistically significant differences in absolute and/or relative isomer abundances.

| Glycan Mass                                           | Composition |        |     |       | Ret. Time | T-Test                | Comparison |
|-------------------------------------------------------|-------------|--------|-----|-------|-----------|-----------------------|------------|
|                                                       | Hex         | HexNAc | Fuc | NeuAc |           |                       |            |
| <i>High mannose</i>                                   |             |        |     |       |           |                       |            |
| 1396.486                                              | 6           | 2      | 0   | 0     | 18.6      | 0.00684               | absolute   |
|                                                       |             |        |     |       | 20.1      | 0.00581               | absolute   |
| 1720.592                                              | 8           | 2      | 0   | 0     | 18.0      | 0.00272               | absolute   |
|                                                       |             |        |     |       | 19.2      | $8.31 \times 10^{-4}$ | absolute   |
| 1882.645                                              | 9           | 2      | 0   | 0     | 17.9      | 0.0351                | absolute   |
|                                                       |             |        |     |       | 19.2      | 0.0392                | absolute   |
|                                                       |             |        |     |       | 19.2      | 0.0281                | relative   |
|                                                       |             |        |     |       | 19.9      | 0.00180               | absolute   |
|                                                       |             |        |     |       | 20.1      | 0.0215                | absolute   |
| 2044.698                                              | 10          | 2      | 0   | 0     | 18.7      | 0.0171                | absolute   |
|                                                       |             |        |     |       | 20.1      | 0.0215                | absolute   |
| <i>Complex/hybrid (nonfucosylated, nonsialylated)</i> |             |        |     |       |           |                       |            |
| 1478.539                                              | 4           | 4      | 0   | 0     | 19.2      | 0.0480                | relative   |
|                                                       |             |        |     |       | 21.1      | 0.00700               | relative   |
| 1519.566                                              | 3           | 5      | 0   | 0     | 15.5      | $6.50 \times 10^{-5}$ | absolute   |
|                                                       |             |        |     |       | 16.6      | $5.25 \times 10^{-5}$ | absolute   |
| 1681.619                                              | 4           | 5      | 0   | 0     | 16.1      | 0.00470               | absolute   |
|                                                       |             |        |     |       | 17.3      | 0.00728               | absolute   |
| <i>Complex/hybrid (fucosylated)</i>                   |             |        |     |       |           |                       |            |
| 1462.544                                              | 3           | 4      | 1   | 0     | 19.0      | 0.0145                | absolute   |
|                                                       |             |        |     |       | 19.0      | 0.0320                | relative   |
|                                                       |             |        |     |       | 20.6      | 0.00590               | absolute   |
|                                                       |             |        |     |       | 20.6      | 0.0353                | relative   |
|                                                       |             |        |     |       | 22.2      | 0.00995               | absolute   |
|                                                       |             |        |     |       | 22.2      | 0.00425               | relative   |
| 1624.597                                              | 4           | 4      | 1   | 0     | 21.7      | $9.68 \times 10^{-5}$ | absolute   |
|                                                       |             |        |     |       | 21.7      | 0.0488                | relative   |
| 1786.650                                              | 5           | 4      | 1   | 0     | 22.4      | 0.00313               | absolute   |
|                                                       |             |        |     |       | 23.9      | 0.00702               | absolute   |
|                                                       |             |        |     |       | 26.1      | 0.0456                | relative   |
| 1665.624                                              | 3           | 5      | 1   | 0     | 18.3      | 0.0127                | absolute   |
|                                                       |             |        |     |       | 18.3      | 0.00143               | relative   |
|                                                       |             |        |     |       | 19.0      | 0.0283                | absolute   |
|                                                       |             |        |     |       | 19.0      | 0.00143               | relative   |
|                                                       |             |        |     |       | 19.3      | 0.0340                | absolute   |
| 1989.729                                              | 5           | 5      | 1   | 0     | 19.3      | 0.0340                | absolute   |
|                                                       |             |        |     |       | 19.3      | 0.0340                | absolute   |
| <i>Complex/hybrid (sialylated)</i>                    |             |        |     |       |           |                       |            |
| 1931.688                                              | 5           | 4      | 0   | 1     | 26.2      | 0.0477                | relative   |
| 2296.820                                              | 6           | 5      | 0   | 1     | 27.8      | 0.00546               | absolute   |
|                                                       |             |        |     |       | 29.3      | 0.0192                | absolute   |
| 2661.952                                              | 7           | 6      | 0   | 1     | 27.3      | $1.22 \times 10^{-6}$ | absolute   |
|                                                       |             |        |     |       | 27.3      | $2.32 \times 10^{-5}$ | relative   |
|                                                       |             |        |     |       | 27.8      | $2.32 \times 10^{-5}$ | relative   |
| <i>Complex/hybrid (fucosylated and sialylated)</i>    |             |        |     |       |           |                       |            |
| 1915.693                                              | 4           | 4      | 1   | 1     | 26.4      | 0.0479                | absolute   |
|                                                       |             |        |     |       | 27.6      | 0.0433                | absolute   |
| 2077.745                                              | 5           | 4      | 1   | 1     | 24.6      | $2.56 \times 10^{-4}$ | absolute   |
|                                                       |             |        |     |       | 24.6      | 0.00305               | relative   |
|                                                       |             |        |     |       | 27.5      | 0.00349               | absolute   |
|                                                       |             |        |     |       | 27.5      | 0.0126                | relative   |
| 2118.772                                              | 4           | 5      | 1   | 1     | 23.4      | 0.00214               | absolute   |
|                                                       |             |        |     |       | 24.1      | $1.14 \times 10^{-4}$ | absolute   |
| 2061.751                                              | 4           | 4      | 2   | 1     | 18.7      | 0.0401                | absolute   |
|                                                       |             |        |     |       | 20.1      | 0.00752               | absolute   |
